# Supplementary material for: Structural and Functional Characterization of the Bacterial Type III Secretion Export Apparatus
Source: PubMed Central journal article supplement (PMC5158082; doi:10.1371/journal.ppat.1006071), 2016-12-15
Supplement: ppat.1006071.s006.pdf [file ppat.1006071.s006.pdf]

### Three detector calibration

dn/dc polypeptide 0.175

dn/dc sugars 0.134

$$MW = k \cdot (LS) \cdot (UV) / (A \cdot (RI)^2)$$

where k is a system constant (from calibration)

A=extinction coefficient expressed in terms of weight concentration [mL/(mg\*cm-1)]

see: Hayashi, Matsui and Takagi  
Methods in Enzymology ((1989) Vol 172, 514-528

Error UV 0.005  
Error LS 0.005  
Error RI 0.005

#### Three det. Approach

| protein | (LS)*(UV)/(A*(RI^2)) |          | computed | error |
|---------|----------------------|----------|----------|-------|
|         | ratio                | MW [kDa] |          |       |
| OVA(1)  | 239.7                | 43       | 47       | 9%    |
| BAM     | 1074.9               | 220      | 211      | 4%    |
| CA      | 164.7                | 29       | 32       | 12%   |
| AD      | 807.030              | 149      | 159      | 6%    |
| BSA (1) | 341.2                | 66       | 67       | 2%    |
| AVERAGE |                      |          |          | 7%    |

Column: S200#5

"three det" calibration constant= 1.96E-01

Based on analyses of standard proteins  
run in the same buffer  
from Hayashi, Matsui and Takagi

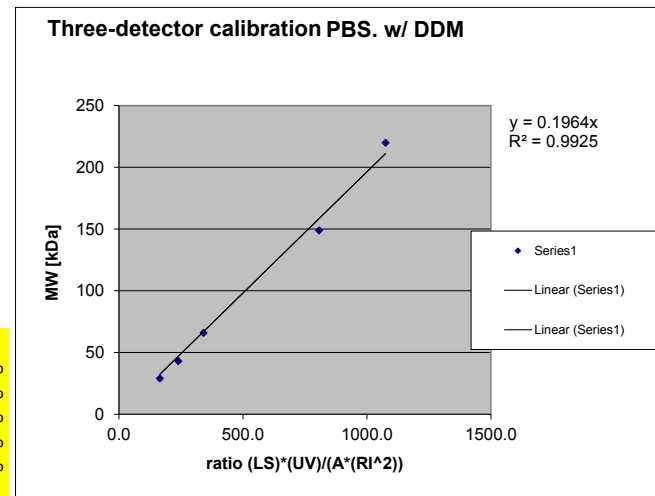

Fig S1
