# Supplementary material for: Structural and Functional Characterization of the Bacterial Type III Secretion Export Apparatus
Source: PubMed Central journal article supplement (PMC5158082; doi:10.1371/journal.ppat.1006071), 2016-12-15
Supplement: ppat.1006071.s012.pdf [file ppat.1006071.s012.pdf]

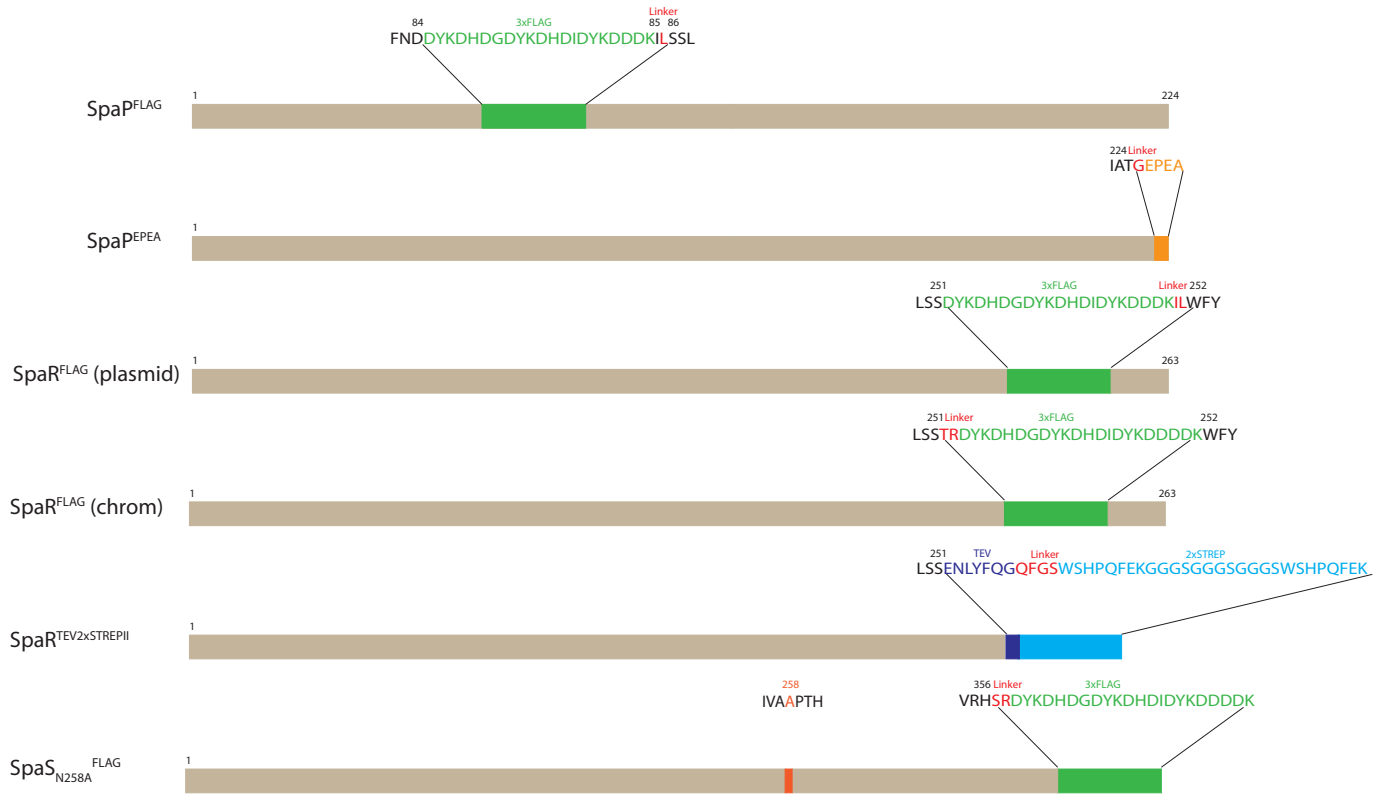

Fig S7
