# Supplementary material for: Structural and Functional Characterization of the Bacterial Type III Secretion Export Apparatus
Source: PubMed Central journal article supplement (PMC5158082; doi:10.1371/journal.ppat.1006071), 2016-12-15
Supplement: ppat.1006071.s014.pdf [file ppat.1006071.s014.pdf]

**ASTRA 5.3.4 Summary Report for PR\_550ul[Sam\_032211a]\_P\_N\_complex**

**Experiment name:** C:\Documents and Settings\ef55.YALE.000\Desktop\Mar\_11\Sam\  
PR\_550ul[Sam\_032211a]\_P\_N\_complex

**Sample:** PR\_550ul (S200#5)

**Processing Operator:** Folta-Stogniew, Ewa

**Collection Operator:** Folta-Stogniew, Ewa

**Collection Astra Version:** 5.3.4.10

**CONFIGURATION**

**Light scattering instrument:** DAWN HELEOS

**Cell type:** K5

**Laser wavelength:** 658.0 nm

**Calibration constant:** 4.7560e-5 1/(V cm)

**Replaced detector:** 12

**Temperature control:** n/a

**Temperature:** n/a

**RI Instrument:** Optilab rEX

**UV Instrument:** Generic UV instrument

**QELS instrument:**

**Model:** Wyatt QELS+

**Use temperature probe:** yes

**Solvent:** PBS, Aqueous

**Refractive index:** 1.340

**Viscosity:** 8.9450e-3 g/(cm sec) (valid if QELS temperature not used)

**Flow rate:** 0.500 mL/min

**PROCESSING**

**Processing time:** Thursday March 24, 2011 03:24 PM Eastern Daylight Time

**Collection time:** Tuesday March 22, 2011 06:34 PM Eastern Daylight Time

**QELS delay time range:** 1.00e-6 to 1.00 sec

**QELS threshold values:** 1.0 to 300.0 nm

**Detectors used:** 4 5 6 7 8 9 10 11 13 14 15 16 17 18

**Concentration detector:** RI

**Mass results fitting:** none (fit degree: n/a)

**Radius results fitting:** none (fit degree: n/a)

**Peak 1**

**Peak limits (mL)** 11.187 - 11.924

**dn/dc (mL/g)** 0.154

**A<sub>2</sub> (mol mL/g<sup>2</sup>)** 0.000

**UV ext. (mL/(g cm))** 0.000

**Model** Debye

**Fit degree** 1

**Injected mass (g)** 0.0000

**Calc. mass (g)** 1.0146e-4

**RESULTS****Peak 1**

**Polydispersity**

**Mw/Mn** 1.000 (0.1%)

**Mz/Mn** 1.000 (0.1%)

**Molar mass moments (g/mol)**

**Mn** 3.109e+5 (0.0%)

**Mp** 3.117e+5 (0.0%)

**Mv** n/a

**Mw** 3.109e+5 (0.0%)

**Mz** 3.109e+5 (0.1%)

**ASTRA 5.3.4 Summary Report for PR\_550ul[Sam\_032211a]\_P\_N\_pp**

**Experiment name:** C:\Documents and Settings\ef55.YALE.000\Desktop\Mar\_11\Sam\  
PR\_550ul[Sam\_032211a]\_P\_N\_pp

**Sample:** PR\_550ul (S200#5)

**Processing Operator:** Folta-Stogniew, Ewa

**Collection Operator:** Folta-Stogniew, Ewa

**Collection Astra Version:** 5.3.4.10

**CONFIGURATION**

**Light scattering instrument:** DAWN HELEOS

**Cell type:** K5

**Laser wavelength:** 658.0 nm

**Calibration constant:** 4.7560e-5 1/(V cm)

**Replaced detector:** 12

**Temperature control:** n/a

**Temperature:** n/a

**RI Instrument:** Optilab rEX

**UV Instrument:** Generic UV instrument

**QELS instrument:**

**Model:** Wyatt QELS+

**Use temperature probe:** yes

**Solvent:** PBS, Aqueous

**Refractive index:** 1.340

**Viscosity:** 8.9450e-3 g/(cm sec) (valid if QELS temperature not used)

**Flow rate:** 0.500 mL/min

**PROCESSING**

**Processing time:** Thursday March 24, 2011 03:24 PM Eastern Daylight Time

**Collection time:** Tuesday March 22, 2011 06:34 PM Eastern Daylight Time

**QELS delay time range:** 1.00e-6 to 1.00 sec

**QELS threshold values:** 1.0 to 300.0 nm

**Detectors used:** 4 5 6 7 8 9 10 11 13 14 15 16 17 18

**Concentration detector:** RI

**Mass results fitting:** none (fit degree: n/a)

**Radius results fitting:** none (fit degree: n/a)

**Peak 1**

**Peak limits (mL)** 11.187 - 11.924

**dn/dc (mL/g)** 0.300

**A<sub>2</sub> (mol mL/g<sup>2</sup>)** 0.000

**UV ext. (mL/(g cm))** 0.000

**Model** Debye

**Fit degree** 1

**Injected mass (g)** 0.0000

**Calc. mass (g)** 5.2085e-5

**RESULTS****Peak 1**

**Polydispersity**

**Mw/Mn** 1.000 (0.1%)

**Mz/Mn** 1.000 (0.1%)

**Molar mass moments (g/mol)**

**Mn** 1.596e+5 (0.0%)

**Mp** 1.600e+5 (0.0%)

**Mv** n/a

**Mw** 1.596e+5 (0.0%)

**Mz** 1.596e+5 (0.1%)
