# Supplementary material for: Structural and Functional Characterization of the Bacterial Type III Secretion Export Apparatus
Source: PLoS Pathog. 2016 Dec 15;12(12):e1006071. doi: 10.1371/journal.ppat.1006071 (PMC5158082; doi:10.1371/journal.ppat.1006071)
Supplement: S3 Table — (XLSX) [file ppat.1006071.s003.xlsx]

## Sheet: EC scores
TableS3: EC scores of coupling prediction. Abbreviations: pos. position, exp. experimental, TMH trans membrane helix, term. Terminus, N N-terminus, C C-terminus, C1 first cytoplasmic loop, P1 first periplasmic loop.
position1	residue_1	position2	residue_2	EC_score	normalized_EC_score	pos. 1 exp. tested	pos. 1 SpaP-SpaP interaction identified	pos. 2 exp. tested	pos. 2 SpaP-SpaP interaction identified	Topological feature (TMH, loop, term.)	suggestion inter or intra contacts
71	A	99	Y	1.161	6.444
96	L	143	I	0.826	4.585
72	Y	79	D	0.807	4.476
30	F	63	V	0.624	3.464			+	–	1 + 2	intra
74	Y	94	E	0.592	3.286
104	I	138	I	0.577	3.202
86	S	94	E	0.569	3.157
40	A	166	Y	0.546	3.031
70	D	101	D	0.514	2.853
38	R	49	N	0.504	2.796
100	R	143	I	0.498	2.765
32	I	155	I	0.497	2.757
31	S	52	L	0.497	2.756
118	A	216	I	0.495	2.749
115	F	152	L	0.489	2.717
26	C	63	V	0.485	2.693			+	–	1 + 2	intra
110	E	209	T	0.466	2.589
33	V	215	L	0.458	2.543
13	F	20	I	0.451	2.503	+	+	+	+	1 + 1	inter
23	S	151	A	0.445	2.471
104	I	146	L	0.438	2.431
72	Y	78	E	0.434	2.407
75	F	95	G	0.422	2.343
122	R	134	D	0.422	2.341
116	E	135	K	0.409	2.271
102	Y	150	Y	0.399	2.216
183	L	192	T	0.392	2.173
31	S	56	A	0.386	2.142
36	M	199	L	0.358	1.987
24	G	99	Y	0.346	1.919
119	Q	144	F	0.344	1.911
121	K	145	A	0.344	1.908
31	S	53	N	0.339	1.882
73	V	79	D	0.335	1.858
30	F	219	Y	0.334	1.851
69	H	144	F	0.33	1.834
104	I	143	I	0.324	1.799
175	V	199	L	0.324	1.797
121	K	142	S	0.323	1.793
23	S	54	G	0.314	1.743
54	G	151	A	0.302	1.678
92	V	143	I	0.302	1.674
114	F	209	T	0.296	1.642
59	L	118	A	0.29	1.607
74	Y	97	D	0.288	1.596
108	D	157	S	0.286	1.589
135	K	141	P	0.285	1.58
38	R	47	P	0.284	1.574
152	L	209	T	0.283	1.569
36	M	43	L	0.276	1.532
72	Y	83	N	0.274	1.523
29	K	219	Y	0.273	1.516
152	L	212	S	0.273	1.513
106	Y	219	Y	0.272	1.51
39	N	46	I	0.27	1.497
37	V	165	L	0.269	1.493
94	E	105	K	0.268	1.49
30	F	59	L	0.268	1.488
81	T	91	H	0.268	1.486
85	I	136	D	0.261	1.449
104	I	141	P	0.258	1.433
205	L	214	G	0.251	1.393	+	–			4 + C
45	Q	191	V	0.244	1.357
114	F	152	L	0.241	1.338
22	A	50	M	0.24	1.333
119	Q	145	A	0.24	1.333
161	I	215	L	0.24	1.333
81	T	88	L	0.238	1.32
33	V	161	I	0.235	1.304
34	F	211	L	0.234	1.296
34	F	52	L	0.233	1.294
32	I	161	I	0.233	1.291
117	N	134	D	0.231	1.283
100	R	146	L	0.231	1.28
11	L	24	G	0.226	1.253
31	S	48	S	0.224	1.245
97	D	143	I	0.223	1.24
117	N	157	S	0.22	1.221
37	V	211	L	0.22	1.218
172	V	201	L	0.219	1.215	+	–	+	–	3 + 4	intra
7	L	165	L	0.217	1.205	+	+			1 + 3	inter
68	M	78	E	0.216	1.202
73	V	89	S	0.216	1.201
39	N	192	T	0.215	1.194
161	I	218	Q	0.215	1.194
209	T	219	Y	0.214	1.187
43	L	167	L	0.212	1.179
97	D	105	K	0.209	1.158
187	M	195	T	0.208	1.155	+	+	+	+	3 + 4	inter
64	M	102	Y	0.208	1.153
58	L	148	P	0.208	1.152	+	+			2 + P1	inter
108	D	156	K	0.207	1.148
73	V	83	N	0.205	1.138
187	M	194	S	0.205	1.137	+	+	+	o	3 + 4	inter
75	F	91	H	0.204	1.135
122	R	138	I	0.203	1.128
112	V	146	L	0.2	1.109
112	V	141	P	0.198	1.097
111	L	156	K	0.197	1.096
71	A	98	G	0.196	1.09
175	V	197	I	0.196	1.09			+	o	3 + 4	ambiguous
26	C	219	Y	0.196	1.09
15	T	22	A	0.196	1.089	+	+			1 + 1	inter
33	V	166	Y	0.196	1.089
37	V	213	K	0.196	1.087
71	A	95	G	0.195	1.085
122	R	136	D	0.195	1.084
33	V	158	A	0.195	1.083
20	I	61	M	0.195	1.082	+	+	+	–	1 + 2	ambiguous
156	K	206	D	0.195	1.081
63	V	219	Y	0.195	1.081	+	–			2 + C	intra
69	H	147	L	0.194	1.079
35	V	45	Q	0.193	1.073
177	S	188	M	0.193	1.073
17	L	30	F	0.192	1.068
46	I	158	A	0.192	1.067
54	G	147	L	0.191	1.062
110	E	217	L	0.191	1.062
165	L	199	L	0.191	1.059
94	E	139	E	0.19	1.054
11	L	17	L	0.189	1.048
80	V	86	S	0.188	1.046
73	V	120	L	0.188	1.046
22	A	28	V	0.188	1.045
43	L	176	V	0.188	1.044
135	K	189	S	0.188	1.044			+	+	P1 + 3	inter
4	D	10	L	0.188	1.043	+	+	+	+	1 + 1	inter
115	F	145	A	0.188	1.043
209	T	216	I	0.187	1.037
81	T	90	K	0.186	1.03
111	L	213	K	0.185	1.027
122	R	135	K	0.185	1.025
116	E	145	A	0.184	1.022
61	M	68	M	0.184	1.019	+	–			2 + 2	ambiguous
12	A	72	Y	0.184	1.019	+	+			1 + 2	inter
93	D	139	E	0.184	1.019
93	D	122	R	0.182	1.008
172	V	205	L	0.18	1	+	–	+	–	3 + 4	intra
85	I	120	L	0.18	0.999
134	D	140	K	0.18	0.997
83	N	93	D	0.178	0.99
16	L	22	A	0.178	0.989
88	L	172	V	0.178	0.986			+	–	P1 + 3	ambiguous
152	L	216	I	0.178	0.985
28	V	53	N	0.177	0.984
100	R	142	S	0.177	0.983
11	L	189	S	0.177	0.981			+	+	1 + 3	inter
28	V	51	T	0.177	0.98
20	I	96	L	0.176	0.979	+	+			1 + P1	inter
120	L	136	D	0.176	0.979
43	L	199	L	0.176	0.979
21	I	68	M	0.176	0.978
94	E	134	D	0.176	0.978
32	I	165	L	0.175	0.974
165	L	205	L	0.174	0.968			+	–	3 + 4	intra
185	M	194	S	0.174	0.965			+	o	3 + 4	ambiguous
24	G	96	L	0.174	0.964
40	A	199	L	0.173	0.961
179	V	210	L	0.172	0.956			+	+	3 + 4	inter
65	W	144	F	0.172	0.955
9	A	81	T	0.171	0.951
135	K	142	S	0.171	0.95
46	I	205	L	0.171	0.948			+	–	C1 + 4	intra
86	S	95	G	0.17	0.942
105	K	121	K	0.17	0.942
152	L	164	Y	0.169	0.94
17	L	23	S	0.169	0.938
97	D	139	E	0.169	0.938
36	M	44	Q	0.169	0.937
168	P	177	S	0.169	0.936
34	F	212	S	0.168	0.931
23	S	183	L	0.167	0.925
200	V	212	S	0.167	0.925	+	+			4 + C	inter
116	E	122	R	0.166	0.924
101	D	167	L	0.166	0.921
21	I	111	L	0.166	0.919
7	L	160	K	0.166	0.919	+	+			1 + P1	inter
23	S	55	V	0.165	0.917			+	o	1 + 2	ambiguous
24	G	147	L	0.165	0.917
39	N	195	T	0.165	0.916			+	+	C1 + 4	inter
113	Q	134	D	0.165	0.915
65	W	121	K	0.164	0.913
26	C	60	S	0.164	0.912			+	–	1 + 3	intra
36	M	183	L	0.164	0.91
165	L	211	L	0.164	0.907
167	L	217	L	0.163	0.907
121	K	144	F	0.163	0.905
121	K	135	K	0.163	0.904
158	A	180	L	0.163	0.904
201	L	208	W	0.163	0.904	+	–			4 + 4	ambiguous
199	L	211	L	0.163	0.904
100	R	141	P	0.163	0.903
15	T	142	S	0.163	0.902	+	+			1 + P1	inter
48	S	180	L	0.162	0.901
160	K	206	D	0.162	0.901
75	F	197	I	0.162	0.899			+	o	2 + 4	ambiguous
8	I	15	T	0.161	0.896			+	+	1 + 1	inter
58	L	147	L	0.161	0.896	+	+			2 + P1	inter
101	D	140	K	0.161	0.895
85	I	94	E	0.161	0.894
73	V	85	I	0.161	0.893
34	F	94	E	0.161	0.893
171	V	188	M	0.161	0.893	+	–			3 + 3	ambiguous
85	I	122	R	0.161	0.892
36	M	162	G	0.16	0.89
34	F	55	V	0.16	0.889			+	o	C1 + 2	ambiguous
36	M	88	L	0.16	0.888
83	N	139	E	0.16	0.888
11	L	22	A	0.16	0.887
135	K	146	L	0.16	0.886
114	F	213	K	0.159	0.884
70	D	144	F	0.159	0.882
50	M	57	L	0.159	0.881
62	F	212	S	0.158	0.88
48	S	67	I	0.158	0.879
116	E	166	Y	0.158	0.879
33	V	47	P	0.158	0.878
109	R	138	I	0.158	0.874
55	V	152	L	0.157	0.872	+	o			2 + P1	ambiguous
117	N	217	L	0.157	0.869
205	L	218	Q	0.157	0.869	+	–			4 + 4	ambiguous
86	S	93	D	0.156	0.868
6	S	13	F	0.156	0.867	+	+	+	+	1 + 1	inter
93	D	105	K	0.156	0.866
21	I	114	F	0.155	0.863
6	S	15	T	0.155	0.862	+	+	+	+	1 + 1	inter
37	V	167	L	0.155	0.86
69	H	90	K	0.155	0.859
89	S	134	D	0.155	0.859
67	I	160	K	0.155	0.858
75	F	86	S	0.154	0.856
36	M	203	V	0.154	0.856			+	+	C1 + 4	inter
39	N	45	Q	0.154	0.855
73	V	121	K	0.154	0.853
27	F	55	V	0.153	0.852			+	o	1 + 2	ambiguous
150	Y	187	M	0.154	0.852			+	+	P1 + 3	inter
50	M	212	S	0.153	0.851
109	R	137	E	0.153	0.85
177	S	186	M	0.153	0.85
90	K	101	D	0.153	0.849
113	Q	137	E	0.153	0.849
5	I	81	T	0.153	0.848	+	+			1 + P1	inter
9	A	15	T	0.152	0.845			+	+	1 + 1	inter
109	R	134	D	0.152	0.842
70	D	92	V	0.152	0.841
91	H	112	V	0.152	0.841
176	V	197	I	0.151	0.841			+	o	3 + 4	ambiguous
82	F	88	L	0.151	0.839
113	Q	151	A	0.151	0.839
174	L	218	Q	0.151	0.839
60	S	68	M	0.151	0.838	+	–			2 + 2	ambiguous
24	G	103	L	0.151	0.837
97	D	144	F	0.151	0.836
69	H	151	A	0.15	0.834
180	L	188	M	0.15	0.834
87	S	95	G	0.15	0.833
109	R	135	K	0.15	0.832
57	L	104	I	0.15	0.831
73	V	122	R	0.15	0.83
55	V	165	L	0.149	0.829	+	o			2 + 3	ambiguous
49	N	151	A	0.149	0.828
108	D	160	K	0.149	0.828
79	D	136	D	0.149	0.827
105	K	137	E	0.149	0.827
135	K	145	A	0.149	0.827
39	N	166	Y	0.149	0.827
175	V	204	A	0.149	0.825			+	+	3 + 4	inter
192	T	209	T	0.149	0.825
21	I	215	L	0.149	0.825
15	T	68	M	0.148	0.823	+	+			1 + 2	inter
74	Y	88	L	0.148	0.823
70	D	98	G	0.148	0.822
26	C	34	F	0.148	0.821
54	G	199	L	0.148	0.821
39	N	217	L	0.148	0.82
105	K	134	D	0.147	0.817
153	S	218	Q	0.147	0.817
8	I	16	L	0.147	0.816
164	Y	188	M	0.147	0.814
6	S	118	A	0.147	0.813	+	+			1 + P1	inter
83	N	109	R	0.146	0.811
83	N	110	E	0.146	0.81
174	L	194	S	0.146	0.81			+	o	3 + 4	ambiguous
83	N	137	E	0.146	0.809
83	N	120	L	0.146	0.808
61	M	82	F	0.145	0.807	+	–			2 + P1	intra
73	V	134	D	0.145	0.807
167	L	178	S	0.145	0.807
100	R	144	F	0.145	0.805
70	D	179	V	0.145	0.805
158	A	183	L	0.145	0.802
95	G	205	L	0.144	0.799
21	I	135	K	0.144	0.799
202	F	208	W	0.144	0.799
37	V	143	I	0.144	0.798
119	Q	179	V	0.144	0.798
85	I	139	E	0.144	0.798
198	K	207	G	0.144	0.798
179	V	192	T	0.144	0.798
183	L	191	V	0.144	0.797
121	K	217	L	0.144	0.797
45	Q	180	L	0.144	0.797
14	S	26	C	0.143	0.796
31	S	46	I	0.143	0.796
11	L	188	M	0.143	0.795
67	I	153	S	0.143	0.794
24	G	151	A	0.143	0.793
40	A	165	L	0.143	0.792
43	L	50	M	0.142	0.788
13	F	109	R	0.142	0.787
93	D	136	D	0.142	0.786
79	D	93	D	0.141	0.785
21	I	57	L	0.141	0.782
16	L	156	K	0.141	0.781
68	M	195	T	0.141	0.78
61	M	144	F	0.14	0.78
145	A	197	I	0.14	0.779
189	S	210	L	0.14	0.779
39	N	199	L	0.14	0.777
103	L	112	V	0.14	0.775
165	L	213	K	0.139	0.774
26	C	69	H	0.139	0.774
56	A	199	L	0.139	0.769
26	C	64	M	0.138	0.768
107	S	149	A	0.138	0.768
158	A	178	S	0.138	0.768
23	S	35	V	0.138	0.765
50	M	147	L	0.138	0.764
105	K	122	R	0.138	0.763
183	L	193	I	0.138	0.763
113	Q	135	K	0.137	0.763
34	F	51	T	0.137	0.761
105	K	149	A	0.137	0.761
61	M	116	E	0.137	0.761
9	A	99	Y	0.137	0.76
85	I	101	D	0.137	0.76
55	V	212	S	0.137	0.76
70	D	89	S	0.137	0.758
100	R	139	E	0.136	0.758
73	V	93	D	0.136	0.757
85	I	140	K	0.136	0.757
191	V	204	A	0.136	0.757
114	F	148	P	0.136	0.756
74	Y	90	K	0.136	0.756
108	D	138	I	0.136	0.754
84	D	205	L	0.136	0.754
74	Y	89	S	0.136	0.753
79	D	137	E	0.136	0.753
99	Y	151	A	0.136	0.752
90	K	138	I	0.135	0.752
35	V	152	L	0.135	0.75
82	F	101	D	0.135	0.749
6	S	179	V	0.135	0.749
86	S	92	V	0.135	0.748
75	F	93	D	0.135	0.747
72	Y	82	F	0.135	0.747
57	L	110	E	0.135	0.747
149	A	157	S	0.134	0.746
39	N	179	V	0.134	0.745
116	E	138	I	0.134	0.745
6	S	29	K	0.134	0.745
27	F	99	Y	0.134	0.744
13	F	60	S	0.134	0.744
46	I	100	R	0.134	0.744
212	S	218	Q	0.134	0.743
4	D	157	S	0.134	0.743
167	L	201	L	0.134	0.741
207	G	215	L	0.133	0.739
161	I	175	V	0.133	0.739
74	Y	211	L	0.133	0.737
34	F	135	K	0.133	0.736
141	P	193	I	0.133	0.736
81	T	87	S	0.132	0.732
183	L	189	S	0.132	0.732
27	F	53	N	0.132	0.732
118	A	134	D	0.132	0.732
188	M	194	S	0.132	0.731
107	S	146	L	0.131	0.729
184	G	190	P	0.131	0.729
90	K	165	L	0.131	0.729
84	D	138	I	0.131	0.728
88	L	166	Y	0.131	0.727
19	F	50	M	0.131	0.727
10	L	67	I	0.131	0.726
8	I	175	V	0.131	0.726
84	D	141	P	0.131	0.726
27	F	34	F	0.13	0.724
11	L	39	N	0.13	0.724
75	F	94	E	0.13	0.722
49	N	174	L	0.13	0.721
6	S	92	V	0.13	0.72
54	G	148	P	0.13	0.719
23	S	218	Q	0.129	0.718
7	L	44	Q	0.129	0.718
116	E	134	D	0.129	0.717
48	S	199	L	0.129	0.717
8	I	18	P	0.129	0.716
19	F	116	E	0.129	0.715
99	Y	172	V	0.129	0.715
70	D	97	D	0.129	0.714
198	K	208	W	0.129	0.714
54	G	197	I	0.129	0.713
64	M	150	Y	0.129	0.713
181	L	211	L	0.129	0.713
61	M	140	K	0.128	0.713
110	E	192	T	0.128	0.712
90	K	137	E	0.128	0.71
40	A	170	V	0.128	0.71
184	G	202	F	0.128	0.71
181	L	187	M	0.128	0.709
171	V	200	V	0.128	0.709
9	A	51	T	0.127	0.707
29	K	157	S	0.127	0.707
36	M	197	I	0.127	0.707
190	P	196	P	0.127	0.706
73	V	137	E	0.127	0.706
70	D	85	I	0.127	0.706
80	V	91	H	0.127	0.705
25	T	34	F	0.127	0.705
90	K	139	E	0.127	0.705
14	S	149	A	0.127	0.704
68	M	99	Y	0.127	0.704
154	E	219	Y	0.127	0.703
103	L	197	I	0.127	0.703
59	L	172	V	0.127	0.703
43	L	192	T	0.126	0.702
57	L	109	R	0.126	0.702
103	L	176	V	0.126	0.702
167	L	214	G	0.126	0.701
80	V	90	K	0.126	0.7
175	V	205	L	0.126	0.699
185	M	193	I	0.126	0.699
196	P	202	F	0.126	0.698
60	S	107	S	0.126	0.697
68	M	172	V	0.126	0.697
36	M	192	T	0.125	0.696
118	A	212	S	0.125	0.696
210	L	219	Y	0.125	0.696
11	L	28	V	0.125	0.695
60	S	89	S	0.125	0.694
78	E	84	D	0.125	0.693
36	M	160	K	0.125	0.693
114	F	174	L	0.125	0.692
49	N	158	A	0.125	0.692
18	P	64	M	0.125	0.692
99	Y	165	L	0.125	0.691
23	S	31	S	0.124	0.691
38	R	186	M	0.124	0.69
60	S	194	S	0.124	0.689
155	I	208	W	0.124	0.689
37	V	160	K	0.124	0.688
35	V	199	L	0.124	0.688
83	N	122	R	0.123	0.685
107	S	157	S	0.123	0.685
8	I	192	T	0.123	0.685
31	S	78	E	0.123	0.684
48	S	188	M	0.123	0.684
121	K	134	D	0.123	0.684
151	A	171	V	0.123	0.684
45	Q	164	Y	0.123	0.683
120	L	134	D	0.123	0.683
111	L	209	T	0.123	0.682
99	Y	164	Y	0.123	0.682
61	M	141	P	0.123	0.682
167	L	186	M	0.123	0.681
116	E	142	S	0.123	0.681
208	W	215	L	0.123	0.681
210	L	217	L	0.122	0.68
80	V	189	S	0.122	0.679
90	K	110	E	0.122	0.679
7	L	81	T	0.122	0.679
53	N	151	A	0.122	0.679
88	L	209	T	0.122	0.678
145	A	165	L	0.122	0.677
30	F	110	E	0.122	0.676
26	C	101	D	0.122	0.676
108	D	115	F	0.122	0.676
42	G	171	V	0.122	0.676
111	L	152	L	0.122	0.675
62	F	68	M	0.121	0.674
41	L	186	M	0.121	0.674
84	D	177	S	0.121	0.674
48	S	59	L	0.121	0.672
191	V	209	T	0.121	0.672
168	P	208	W	0.121	0.671
112	V	144	F	0.121	0.671
184	G	196	P	0.121	0.671
32	I	52	L	0.121	0.67
93	D	137	E	0.121	0.67
91	H	204	A	0.121	0.669
46	I	200	V	0.12	0.669
44	Q	199	L	0.12	0.668
75	F	103	L	0.12	0.667
5	I	86	S	0.12	0.667
12	A	18	P	0.12	0.666
87	S	97	D	0.12	0.666
70	D	134	D	0.12	0.666
182	A	210	L	0.12	0.666
84	D	90	K	0.12	0.666
100	R	148	P	0.12	0.665
32	I	61	M	0.12	0.665
67	I	118	A	0.12	0.664
107	S	153	S	0.12	0.663
69	H	138	I	0.119	0.663
192	T	205	L	0.119	0.663
55	V	78	E	0.119	0.663
117	N	137	E	0.119	0.663
35	V	189	S	0.119	0.662
39	N	191	V	0.119	0.66
117	N	213	K	0.119	0.66
6	S	211	L	0.119	0.66
14	S	52	L	0.119	0.66
52	L	136	D	0.119	0.66
113	Q	156	K	0.119	0.66
7	L	197	I	0.119	0.659
32	I	215	L	0.119	0.659
11	L	93	D	0.119	0.659
33	V	40	A	0.119	0.658
7	L	51	T	0.119	0.658
108	D	114	F	0.119	0.658
178	S	191	V	0.119	0.658
99	Y	109	R	0.118	0.658
31	S	44	Q	0.118	0.657
101	D	137	E	0.118	0.657
6	S	182	A	0.118	0.657
59	L	168	P	0.118	0.655
41	L	191	V	0.118	0.655
73	V	110	E	0.118	0.655
158	A	203	V	0.118	0.655
82	F	165	L	0.118	0.653
63	V	73	V	0.117	0.652
34	F	161	I	0.117	0.652
5	I	84	D	0.117	0.652
59	L	212	S	0.117	0.651
94	E	138	I	0.117	0.651
60	S	189	S	0.117	0.65
59	L	216	I	0.117	0.65
196	P	207	G	0.117	0.65
180	L	187	M	0.117	0.649
11	L	174	L	0.117	0.648
11	L	166	Y	0.117	0.648
104	I	134	D	0.117	0.647
51	T	138	I	0.117	0.647
17	L	54	G	0.116	0.647
170	V	177	S	0.116	0.647
170	V	191	V	0.116	0.646
106	Y	122	R	0.116	0.646
16	L	56	A	0.116	0.646
9	A	21	I	0.116	0.646
43	L	186	M	0.116	0.646
142	S	167	L	0.116	0.644
36	M	156	K	0.116	0.644
75	F	175	V	0.116	0.643
65	W	134	D	0.116	0.643
82	F	204	A	0.116	0.642
10	L	24	G	0.116	0.642
149	A	178	S	0.116	0.642
180	L	190	P	0.116	0.642
36	M	191	V	0.116	0.642
7	L	170	V	0.116	0.642
8	I	171	V	0.116	0.641
96	L	179	V	0.116	0.641
92	V	163	F	0.115	0.64
62	F	148	P	0.115	0.64
31	S	182	A	0.115	0.64
199	L	209	T	0.115	0.639
161	I	170	V	0.115	0.639
7	L	214	G	0.115	0.638
46	I	181	L	0.115	0.637
42	G	177	S	0.115	0.636
114	F	149	A	0.115	0.636
8	I	14	S	0.115	0.636
53	N	201	L	0.115	0.636
82	F	171	V	0.114	0.635
94	E	116	E	0.114	0.635
19	F	58	L	0.114	0.635
156	K	182	A	0.114	0.634
200	V	213	K	0.114	0.632
178	S	188	M	0.114	0.632
30	F	211	L	0.114	0.632
35	V	176	V	0.114	0.632
74	Y	87	S	0.114	0.632
41	L	215	L	0.114	0.631
57	L	63	V	0.114	0.631
55	V	195	T	0.114	0.63
116	E	214	G	0.114	0.63
84	D	135	K	0.113	0.63
160	K	200	V	0.113	0.629
89	S	121	K	0.113	0.629
61	M	79	D	0.113	0.629
73	V	206	D	0.113	0.628
13	F	78	E	0.113	0.628
7	L	88	L	0.113	0.628
100	R	216	I	0.113	0.627
114	F	216	I	0.113	0.627
28	V	216	I	0.113	0.627
4	D	160	K	0.113	0.626
65	W	82	F	0.113	0.626
22	A	145	A	0.113	0.626
52	L	100	R	0.113	0.626
17	L	115	F	0.113	0.625
82	F	136	D	0.113	0.625
94	E	117	N	0.113	0.625
122	R	145	A	0.113	0.625
134	D	217	L	0.112	0.624
45	Q	84	D	0.112	0.624
10	L	139	E	0.112	0.624
24	G	62	F	0.112	0.623
97	D	122	R	0.112	0.623
26	C	113	Q	0.112	0.623
32	I	119	Q	0.112	0.623
116	E	140	K	0.112	0.622
59	L	115	F	0.112	0.622
5	I	211	L	0.112	0.622
110	E	206	D	0.112	0.622
62	F	117	N	0.112	0.622
158	A	167	L	0.112	0.622
190	P	198	K	0.112	0.621
72	Y	170	V	0.112	0.621
79	D	89	S	0.112	0.621
67	I	139	E	0.112	0.621
86	S	103	L	0.112	0.62
56	A	63	V	0.111	0.618
56	A	94	E	0.111	0.618
172	V	193	I	0.111	0.617
10	L	17	L	0.111	0.616
35	V	177	S	0.111	0.616
9	A	88	L	0.111	0.616
193	I	204	A	0.111	0.616
15	T	91	H	0.111	0.615
122	R	192	T	0.111	0.614
15	T	154	E	0.111	0.614
69	H	140	K	0.111	0.614
13	F	46	I	0.11	0.612
119	Q	149	A	0.11	0.612
36	M	189	S	0.11	0.612
28	V	193	I	0.11	0.612
140	K	170	V	0.11	0.612
68	M	204	A	0.11	0.611
32	I	158	A	0.11	0.611
96	L	146	L	0.11	0.61
58	L	201	L	0.11	0.61
32	I	211	L	0.11	0.61
71	A	82	F	0.11	0.61
62	F	142	S	0.11	0.61
78	E	101	D	0.11	0.61
19	F	138	I	0.11	0.609
117	N	209	T	0.11	0.609
22	A	82	F	0.11	0.609
118	A	210	L	0.11	0.608
121	K	136	D	0.109	0.608
41	L	62	F	0.109	0.608
166	Y	180	L	0.109	0.608
16	L	86	S	0.109	0.606
17	L	204	A	0.109	0.606
90	K	174	L	0.109	0.606
155	I	167	L	0.109	0.606
87	S	206	D	0.109	0.606
67	I	98	G	0.109	0.604
89	S	117	N	0.109	0.604
26	C	192	T	0.109	0.604
104	I	166	Y	0.109	0.604
15	T	103	L	0.109	0.604
106	Y	150	Y	0.109	0.603
36	M	200	V	0.108	0.602
57	L	84	D	0.108	0.602
13	F	74	Y	0.108	0.601
34	F	218	Q	0.108	0.601
23	S	148	P	0.108	0.601
17	L	152	L	0.108	0.6
108	D	152	L	0.108	0.6
55	V	80	V	0.108	0.6
26	C	150	Y	0.108	0.6
70	D	136	D	0.108	0.6
10	L	58	L	0.108	0.598
153	S	215	L	0.108	0.598
175	V	206	D	0.108	0.598
10	L	95	G	0.108	0.598
12	A	168	P	0.108	0.598
22	A	30	F	0.108	0.597
62	F	115	F	0.108	0.597
116	E	167	L	0.108	0.597
85	I	121	K	0.108	0.597
184	G	198	K	0.107	0.596
157	S	189	S	0.107	0.596
72	Y	116	E	0.107	0.596
153	S	161	I	0.107	0.596
156	K	188	M	0.107	0.596
24	G	107	S	0.107	0.596
67	I	102	Y	0.107	0.595
80	V	194	S	0.107	0.595
22	A	149	A	0.107	0.595
67	I	157	S	0.107	0.594
157	S	167	L	0.107	0.594
17	L	189	S	0.107	0.594
70	D	120	L	0.107	0.593
181	L	195	T	0.107	0.593
50	M	170	V	0.107	0.592
26	C	152	L	0.106	0.591
11	L	210	L	0.106	0.591
35	V	197	I	0.106	0.59
15	T	201	L	0.106	0.59
36	M	161	I	0.106	0.59
29	K	111	L	0.106	0.59
30	F	212	S	0.106	0.59
30	F	71	A	0.106	0.589
59	L	217	L	0.106	0.589
193	I	203	V	0.106	0.589
58	L	205	L	0.106	0.588
73	V	117	N	0.106	0.588
91	H	108	D	0.106	0.588
115	F	200	V	0.106	0.588
15	T	113	Q	0.106	0.586
80	V	108	D	0.105	0.585
20	I	116	E	0.105	0.585
86	S	140	K	0.105	0.585
29	K	39	N	0.105	0.585
16	L	43	L	0.105	0.585
200	V	214	G	0.105	0.585
74	Y	93	D	0.105	0.584
50	M	62	F	0.105	0.584
84	D	195	T	0.105	0.583
21	I	155	I	0.105	0.583
100	R	113	Q	0.105	0.583
171	V	216	I	0.105	0.583
28	V	111	L	0.105	0.582
63	V	166	Y	0.105	0.582
105	K	151	A	0.105	0.582
158	A	199	L	0.105	0.582
40	A	48	S	0.105	0.582
56	A	66	P	0.105	0.581
59	L	180	L	0.105	0.581
160	K	174	L	0.105	0.581
62	F	214	G	0.105	0.581
146	L	163	F	0.104	0.58
146	L	170	V	0.104	0.579
96	L	174	L	0.104	0.579
109	R	122	R	0.104	0.579
200	V	216	I	0.104	0.578
79	D	209	T	0.104	0.578
171	V	186	M	0.104	0.577
12	A	91	H	0.104	0.577
174	L	193	I	0.104	0.577
87	S	139	E	0.104	0.576
5	I	11	L	0.104	0.576
174	L	186	M	0.104	0.576
109	R	136	D	0.104	0.576
85	I	97	D	0.104	0.576
156	K	197	I	0.104	0.575
164	Y	216	I	0.104	0.575
95	G	114	F	0.104	0.575
101	D	139	E	0.104	0.575
4	D	17	L	0.104	0.575
87	S	134	D	0.104	0.575
197	I	215	L	0.103	0.574
79	D	195	T	0.103	0.574
135	K	164	Y	0.103	0.574
55	V	109	R	0.103	0.573
24	G	110	E	0.103	0.573
32	I	214	G	0.103	0.573
183	L	199	L	0.103	0.571
63	V	201	L	0.103	0.57
57	L	99	Y	0.103	0.57
10	L	21	I	0.103	0.569
31	S	181	L	0.103	0.569
82	F	90	K	0.103	0.569
5	I	13	F	0.102	0.568
104	I	140	K	0.102	0.568
163	F	170	V	0.102	0.567
52	L	97	D	0.102	0.567
22	A	88	L	0.102	0.567
45	Q	160	K	0.102	0.567
14	S	155	I	0.102	0.566
5	I	37	V	0.102	0.566
196	P	208	W	0.102	0.566
56	A	219	Y	0.102	0.566
31	S	50	M	0.102	0.566
191	V	217	L	0.102	0.566
104	I	112	V	0.102	0.565
109	R	116	E	0.102	0.565
7	L	20	I	0.102	0.564
141	P	149	A	0.102	0.564
43	L	171	V	0.101	0.563
19	F	35	V	0.101	0.563
143	I	164	Y	0.101	0.563
39	N	213	K	0.101	0.563
13	F	55	V	0.101	0.563
97	D	142	S	0.101	0.563
7	L	24	G	0.101	0.563
37	V	214	G	0.101	0.563
57	L	92	V	0.101	0.562
166	Y	199	L	0.101	0.562
42	G	219	Y	0.101	0.562
50	M	114	F	0.101	0.562
154	E	168	P	0.101	0.562
21	I	38	R	0.101	0.562
63	V	180	L	0.101	0.561
16	L	212	S	0.101	0.561
4	D	88	L	0.101	0.561
35	V	212	S	0.101	0.56
17	L	37	V	0.101	0.56
46	I	191	V	0.101	0.56
145	A	171	V	0.101	0.56
46	I	52	L	0.101	0.559
10	L	117	N	0.101	0.559
41	L	79	D	0.101	0.559
110	E	137	E	0.101	0.558
99	Y	146	L	0.101	0.558
82	F	108	D	0.101	0.558
153	S	168	P	0.1	0.558
78	E	89	S	0.1	0.558
101	D	150	Y	0.1	0.558
26	C	42	G	0.1	0.557
206	D	215	L	0.1	0.557
143	I	150	Y	0.1	0.556
109	R	118	A	0.1	0.556
137	E	174	L	0.1	0.556
53	N	110	E	0.1	0.556
10	L	71	A	0.1	0.555
59	L	101	D	0.1	0.555
41	L	113	Q	0.1	0.555
198	K	215	L	0.1	0.555
92	V	156	K	0.1	0.554
121	K	146	L	0.1	0.554
87	S	183	L	0.1	0.554
58	L	65	W	0.1	0.554
71	A	112	V	0.1	0.554
160	K	166	Y	0.1	0.553
83	N	89	S	0.1	0.553
103	L	163	F	0.1	0.553
10	L	37	V	0.1	0.553
105	K	136	D	0.099	0.552
89	S	109	R	0.099	0.552
29	K	53	N	0.099	0.552
39	N	160	K	0.099	0.552
60	S	215	L	0.099	0.551
26	C	177	S	0.099	0.551
115	F	201	L	0.099	0.551
56	A	84	D	0.099	0.551
69	H	85	I	0.099	0.551
10	L	79	D	0.099	0.551
155	I	193	I	0.099	0.55
28	V	49	N	0.099	0.549
6	S	12	A	0.099	0.549
186	M	213	K	0.099	0.549
166	Y	195	T	0.099	0.549
8	I	103	L	0.099	0.549
120	L	138	I	0.099	0.549
164	Y	178	S	0.099	0.548
8	I	197	I	0.099	0.548
43	L	166	Y	0.099	0.548
63	V	171	V	0.099	0.547
21	I	60	S	0.099	0.547
61	M	90	K	0.099	0.547
6	S	213	K	0.099	0.547
141	P	167	L	0.099	0.547
182	A	190	P	0.099	0.547
106	Y	194	S	0.099	0.547
17	L	156	K	0.098	0.547
39	N	211	L	0.098	0.547
93	D	138	I	0.098	0.547
10	L	109	R	0.098	0.546
7	L	113	Q	0.098	0.546
26	C	102	Y	0.098	0.546
160	K	214	G	0.098	0.545
54	G	152	L	0.098	0.545
86	S	205	L	0.098	0.544
35	V	170	V	0.098	0.544
20	I	73	V	0.098	0.544
104	I	116	E	0.098	0.544
24	G	161	I	0.098	0.544
50	M	58	L	0.098	0.544
34	F	60	S	0.098	0.544
93	D	121	K	0.098	0.544
203	V	209	T	0.098	0.544
10	L	78	E	0.098	0.543
16	L	121	K	0.098	0.543
44	Q	209	T	0.098	0.543
57	L	218	Q	0.098	0.543
122	R	137	E	0.098	0.542
174	L	197	I	0.098	0.542
7	L	16	L	0.098	0.541
93	D	209	T	0.097	0.541
89	S	95	G	0.097	0.541
207	G	216	I	0.097	0.541
20	I	100	R	0.097	0.539
140	K	155	I	0.097	0.539
134	D	160	K	0.097	0.539
89	S	176	V	0.097	0.538
105	K	174	L	0.097	0.538
30	F	164	Y	0.097	0.538
10	L	174	L	0.097	0.538
101	D	211	L	0.097	0.538
41	L	192	T	0.097	0.538
104	I	139	E	0.097	0.537
67	I	136	D	0.097	0.536
54	G	162	G	0.097	0.536
104	I	136	D	0.097	0.536
52	L	75	F	0.097	0.536
44	Q	213	K	0.097	0.536
39	N	189	S	0.097	0.536
82	F	119	Q	0.096	0.535
136	D	177	S	0.096	0.534
166	Y	174	L	0.096	0.534
74	Y	136	D	0.096	0.534
144	F	211	L	0.096	0.534
44	Q	74	Y	0.096	0.534
36	M	148	P	0.096	0.534
122	R	144	F	0.096	0.534
46	I	203	V	0.096	0.534
36	M	84	D	0.096	0.534
171	V	205	L	0.096	0.533
30	F	52	L	0.096	0.533
158	A	181	L	0.096	0.532
165	L	200	V	0.096	0.532
81	T	106	Y	0.096	0.532
65	W	89	S	0.096	0.532
110	E	161	I	0.096	0.532
170	V	193	I	0.096	0.532
54	G	201	L	0.096	0.532
184	G	194	S	0.096	0.532
8	I	181	L	0.096	0.532
7	L	101	D	0.096	0.531
29	K	36	M	0.096	0.531
4	D	179	V	0.096	0.531
53	N	117	N	0.096	0.531
66	P	201	L	0.096	0.531
73	V	113	Q	0.096	0.531
35	V	43	L	0.096	0.53
28	V	46	I	0.096	0.53
26	C	109	R	0.096	0.53
8	I	144	F	0.095	0.53
78	E	171	V	0.095	0.529
97	D	117	N	0.095	0.528
67	I	99	Y	0.095	0.528
68	M	93	D	0.095	0.528
48	S	166	Y	0.095	0.527
44	Q	159	F	0.095	0.527
39	N	163	F	0.095	0.527
97	D	134	D	0.095	0.527
47	P	151	A	0.095	0.526
92	V	219	Y	0.095	0.526
20	I	148	P	0.095	0.526
207	G	218	Q	0.095	0.526
150	Y	175	V	0.095	0.525
50	M	188	M	0.095	0.525
41	L	82	F	0.095	0.525
188	M	195	T	0.095	0.525
8	I	134	D	0.095	0.525
89	S	164	Y	0.094	0.524
57	L	172	V	0.094	0.524
101	D	138	I	0.094	0.524
5	I	154	E	0.094	0.524
89	S	101	D	0.094	0.524
12	A	26	C	0.094	0.523
101	D	122	R	0.094	0.523
4	D	211	L	0.094	0.523
194	S	203	V	0.094	0.522
17	L	47	P	0.094	0.522
35	V	160	K	0.094	0.522
20	I	186	M	0.094	0.522
48	S	182	A	0.094	0.522
118	A	186	M	0.094	0.522
189	S	209	T	0.094	0.521
40	A	146	L	0.094	0.521
104	I	211	L	0.094	0.521
105	K	146	L	0.094	0.521
24	G	115	F	0.094	0.52
13	F	95	G	0.094	0.519
30	F	40	A	0.094	0.519
10	L	69	H	0.093	0.519
152	L	189	S	0.093	0.518
97	D	140	K	0.093	0.518
117	N	139	E	0.093	0.518
87	S	116	E	0.093	0.518
80	V	181	L	0.093	0.517
13	F	167	L	0.093	0.517
50	M	158	A	0.093	0.517
53	N	200	V	0.093	0.516
5	I	72	Y	0.093	0.516
105	K	177	S	0.093	0.515
160	K	183	L	0.093	0.515
38	R	60	S	0.093	0.515
12	A	151	A	0.093	0.515
6	S	81	T	0.093	0.515
17	L	50	M	0.093	0.515
41	L	90	K	0.093	0.515
58	L	151	A	0.093	0.515
65	W	107	S	0.093	0.515
35	V	161	I	0.093	0.514
69	H	101	D	0.093	0.514
28	V	50	M	0.093	0.514
37	V	147	L	0.093	0.514
62	F	180	L	0.093	0.514
138	I	182	A	0.093	0.514
16	L	44	Q	0.093	0.514
57	L	89	S	0.093	0.514
37	V	46	I	0.092	0.513
41	L	181	L	0.092	0.513
23	S	93	D	0.092	0.512
147	L	193	I	0.092	0.512
6	S	106	Y	0.092	0.512
149	A	197	I	0.092	0.512
54	G	69	H	0.092	0.511
165	L	175	V	0.092	0.511
85	I	92	V	0.092	0.511
32	I	147	L	0.092	0.51
206	D	213	K	0.092	0.51
68	M	217	L	0.092	0.51
50	M	61	M	0.092	0.51
171	V	182	A	0.092	0.509
70	D	94	E	0.092	0.509
29	K	154	E	0.092	0.509
59	L	158	A	0.092	0.509
118	A	177	S	0.092	0.509
88	L	145	A	0.092	0.508
11	L	217	L	0.092	0.508
46	I	55	V	0.091	0.507
198	K	206	D	0.091	0.507
115	F	164	Y	0.091	0.507
32	I	90	K	0.091	0.507
183	L	218	Q	0.091	0.506
71	A	90	K	0.091	0.506
101	D	136	D	0.091	0.506
104	I	119	Q	0.091	0.506
199	L	214	G	0.091	0.505
4	D	143	I	0.091	0.504
49	N	195	T	0.091	0.504
11	L	68	M	0.091	0.504
13	F	189	S	0.091	0.504
40	A	178	S	0.091	0.504
33	V	41	L	0.091	0.503
59	L	189	S	0.091	0.503
6	S	116	E	0.091	0.503
190	P	207	G	0.091	0.502
60	S	150	Y	0.09	0.502
146	L	218	Q	0.09	0.502
19	F	110	E	0.09	0.502
63	V	101	D	0.09	0.502
86	S	137	E	0.09	0.501
14	S	140	K	0.09	0.501
45	Q	158	A	0.09	0.501
10	L	94	E	0.09	0.501
7	L	48	S	0.09	0.5
161	I	211	L	0.09	0.5
61	M	153	S	0.09	0.5
11	L	197	I	0.09	0.5
10	L	171	V	0.09	0.499
176	V	210	L	0.09	0.499
44	Q	217	L	0.09	0.499
163	F	183	L	0.09	0.499
40	A	175	V	0.09	0.498
61	M	136	D	0.09	0.498
86	S	120	L	0.09	0.498
87	S	157	S	0.09	0.498
120	L	140	K	0.09	0.498
26	C	46	I	0.09	0.498
14	S	20	I	0.09	0.498
91	H	104	I	0.09	0.497
22	A	58	L	0.09	0.497
110	E	144	F	0.09	0.497
59	L	150	Y	0.09	0.497
53	N	177	S	0.09	0.497
14	S	174	L	0.09	0.497
17	L	102	Y	0.089	0.497
46	I	199	L	0.089	0.497
43	L	54	G	0.089	0.497
27	F	203	V	0.089	0.496
61	M	186	M	0.089	0.496
40	A	57	L	0.089	0.496
98	G	107	S	0.089	0.495
122	R	141	P	0.089	0.495
185	M	196	P	0.089	0.495
73	V	145	A	0.089	0.495
190	P	202	F	0.089	0.495
101	D	135	K	0.089	0.494
35	V	74	Y	0.089	0.494
118	A	183	L	0.089	0.494
39	N	164	Y	0.089	0.494
122	R	188	M	0.089	0.494
162	G	185	M	0.089	0.494
59	L	177	S	0.089	0.494
38	R	52	L	0.089	0.493
154	E	206	D	0.089	0.493
154	E	183	L	0.089	0.493
15	T	34	F	0.089	0.493
105	K	116	E	0.089	0.493
73	V	140	K	0.089	0.493
65	W	143	I	0.089	0.493
167	L	216	I	0.089	0.492
205	L	213	K	0.089	0.492
75	F	96	L	0.089	0.492
23	S	83	N	0.089	0.492
183	L	214	G	0.089	0.492
27	F	164	Y	0.089	0.492
135	K	176	V	0.089	0.492
98	G	161	I	0.089	0.492
82	F	157	S	0.089	0.492
12	A	186	M	0.089	0.491
36	M	137	E	0.088	0.491
93	D	134	D	0.088	0.491
56	A	186	M	0.088	0.49
178	S	197	I	0.088	0.49
100	R	204	A	0.088	0.49
21	I	44	Q	0.088	0.49
45	Q	153	S	0.088	0.49
88	L	217	L	0.088	0.489
184	G	207	G	0.088	0.489
51	T	181	L	0.088	0.489
4	D	58	L	0.088	0.489
90	K	120	L	0.088	0.489
12	A	80	V	0.088	0.489
54	G	78	E	0.088	0.488
115	F	156	K	0.088	0.488
149	A	202	F	0.088	0.487
107	S	136	D	0.088	0.487
135	K	166	Y	0.088	0.486
88	L	148	P	0.088	0.486
5	I	58	L	0.088	0.486
118	A	191	V	0.088	0.486
110	E	116	E	0.087	0.486
78	E	211	L	0.087	0.485
45	Q	177	S	0.087	0.485
11	L	18	P	0.087	0.485
137	E	210	L	0.087	0.484
8	I	157	S	0.087	0.484
24	G	179	V	0.087	0.484
50	M	211	L	0.087	0.483
14	S	21	I	0.087	0.483
36	M	177	S	0.087	0.483
22	A	144	F	0.087	0.483
5	I	12	A	0.087	0.483
137	E	179	V	0.087	0.482
204	A	210	L	0.087	0.481
69	H	205	L	0.087	0.481
93	D	100	R	0.087	0.481
84	D	209	T	0.087	0.481
41	L	101	D	0.087	0.481
157	S	164	Y	0.087	0.481
57	L	134	D	0.087	0.481
101	D	107	S	0.087	0.481
211	L	219	Y	0.087	0.481
35	V	214	G	0.087	0.48
89	S	97	D	0.086	0.479
88	L	134	D	0.086	0.479
85	I	217	L	0.086	0.479
36	M	188	M	0.086	0.479
137	E	191	V	0.086	0.479
106	Y	157	S	0.086	0.479
14	S	27	F	0.086	0.479
100	R	209	T	0.086	0.478
152	L	194	S	0.086	0.478
19	F	72	Y	0.086	0.478
96	L	145	A	0.086	0.478
31	S	164	Y	0.086	0.478
99	Y	147	L	0.086	0.477
69	H	139	E	0.086	0.477
163	F	172	V	0.086	0.477
17	L	163	F	0.086	0.477
21	I	144	F	0.086	0.476
63	V	136	D	0.086	0.476
94	E	166	Y	0.086	0.476
86	S	139	E	0.086	0.476
50	M	73	V	0.086	0.475
139	E	211	L	0.086	0.475
134	D	203	V	0.086	0.475
24	G	192	T	0.086	0.475
166	Y	191	V	0.086	0.475
93	D	120	L	0.086	0.475
22	A	49	N	0.085	0.474
39	N	181	L	0.085	0.474
195	T	218	Q	0.085	0.474
9	A	36	M	0.085	0.474
37	V	206	D	0.085	0.474
25	T	33	V	0.085	0.473
94	E	144	F	0.085	0.473
22	A	35	V	0.085	0.473
71	A	83	N	0.085	0.473
102	Y	197	I	0.085	0.473
114	F	122	R	0.085	0.473
84	D	164	Y	0.085	0.473
96	L	170	V	0.085	0.473
23	S	174	L	0.085	0.472
153	S	163	F	0.085	0.472
96	L	122	R	0.085	0.472
5	I	151	A	0.085	0.472
57	L	197	I	0.085	0.472
35	V	205	L	0.085	0.471
74	Y	121	K	0.085	0.471
65	W	74	Y	0.085	0.471
53	N	166	Y	0.085	0.471
72	Y	87	S	0.085	0.471
15	T	49	N	0.085	0.471
67	I	166	Y	0.085	0.471
44	Q	164	Y	0.085	0.471
147	L	176	V	0.085	0.471
9	A	118	A	0.085	0.471
156	K	192	T	0.085	0.471
195	T	206	D	0.085	0.47
65	W	120	L	0.085	0.47
91	H	156	K	0.085	0.47
54	G	189	S	0.085	0.47
56	A	180	L	0.085	0.47
187	M	196	P	0.085	0.47
15	T	136	D	0.085	0.47
101	D	141	P	0.085	0.469
10	L	193	I	0.085	0.469
183	L	212	S	0.085	0.469
172	V	179	V	0.085	0.469
7	L	188	M	0.085	0.469
85	I	138	I	0.085	0.469
118	A	164	Y	0.084	0.469
60	S	97	D	0.084	0.469
19	F	183	L	0.084	0.469
149	A	195	T	0.084	0.469
160	K	186	M	0.084	0.468
62	F	112	V	0.084	0.468
82	F	122	R	0.084	0.468
103	L	175	V	0.084	0.468
31	S	49	N	0.084	0.468
44	Q	165	L	0.084	0.468
178	S	206	D	0.084	0.468
61	M	91	H	0.084	0.467
52	L	170	V	0.084	0.467
153	S	173	D	0.084	0.467
22	A	183	L	0.084	0.467
4	D	156	K	0.084	0.467
50	M	151	A	0.084	0.466
63	V	217	L	0.084	0.466
138	I	209	T	0.084	0.466
109	R	193	I	0.084	0.465
46	I	186	M	0.084	0.465
32	I	159	F	0.084	0.465
24	G	181	L	0.084	0.465
26	C	67	I	0.084	0.464
15	T	48	S	0.084	0.464
38	R	44	Q	0.084	0.464
29	K	46	I	0.084	0.464
166	Y	205	L	0.084	0.464
6	S	204	A	0.084	0.464
172	V	197	I	0.084	0.464
42	G	195	T	0.084	0.464
36	M	145	A	0.084	0.463
180	L	196	P	0.084	0.463
106	Y	170	V	0.083	0.463
92	V	137	E	0.083	0.463
6	S	157	S	0.083	0.463
108	D	153	S	0.083	0.463
45	Q	52	L	0.083	0.463
4	D	115	F	0.083	0.463
32	I	164	Y	0.083	0.462
118	A	144	F	0.083	0.462
20	I	182	A	0.083	0.462
22	A	96	L	0.083	0.462
82	F	89	S	0.083	0.462
155	I	168	P	0.083	0.462
11	L	143	I	0.083	0.462
45	Q	65	W	0.083	0.462
161	I	214	G	0.083	0.461
153	S	170	V	0.083	0.461
69	H	204	A	0.083	0.461
42	G	65	W	0.083	0.461
198	K	211	L	0.083	0.46
22	A	146	L	0.083	0.46
82	F	112	V	0.083	0.46
24	G	40	A	0.083	0.46
85	I	188	M	0.083	0.46
160	K	193	I	0.083	0.46
50	M	201	L	0.083	0.46
32	I	38	R	0.083	0.459
10	L	156	K	0.083	0.459
4	D	11	L	0.083	0.459
117	N	200	V	0.083	0.459
63	V	115	F	0.083	0.458
42	G	169	F	0.082	0.458
111	L	170	V	0.082	0.457
91	H	110	E	0.082	0.457
69	H	136	D	0.082	0.457
177	S	206	D	0.082	0.456
24	G	143	I	0.082	0.456
171	V	189	S	0.082	0.456
9	A	44	Q	0.082	0.456
20	I	193	I	0.082	0.456
61	M	147	L	0.082	0.456
55	V	209	T	0.082	0.456
107	S	156	K	0.082	0.456
5	I	104	I	0.082	0.455
22	A	110	E	0.082	0.455
98	G	185	M	0.082	0.455
15	T	95	G	0.082	0.455
49	N	172	V	0.082	0.454
98	G	150	Y	0.082	0.454
107	S	177	S	0.082	0.454
15	T	147	L	0.082	0.454
16	L	120	L	0.082	0.454
19	F	28	V	0.082	0.454
91	H	216	I	0.082	0.454
73	V	82	F	0.082	0.453
31	S	106	Y	0.082	0.453
205	L	215	L	0.082	0.453
207	G	214	G	0.082	0.453
24	G	209	T	0.082	0.452
35	V	156	K	0.081	0.452
171	V	210	L	0.081	0.452
67	I	104	I	0.081	0.452
199	L	207	G	0.081	0.452
145	A	158	A	0.081	0.451
78	E	93	D	0.081	0.451
117	N	145	A	0.081	0.451
56	A	64	M	0.081	0.451
18	P	169	F	0.081	0.45
5	I	96	L	0.081	0.45
182	A	208	W	0.081	0.45
30	F	58	L	0.081	0.45
170	V	194	S	0.081	0.45
28	V	203	V	0.081	0.45
9	A	144	F	0.081	0.45
45	Q	219	Y	0.081	0.449
22	A	56	A	0.081	0.449
137	E	217	L	0.081	0.449
179	V	203	V	0.081	0.449
75	F	118	A	0.081	0.449
42	G	84	D	0.081	0.449
15	T	33	V	0.081	0.449
197	I	207	G	0.081	0.448
134	D	151	A	0.081	0.448
105	K	117	N	0.081	0.448
9	A	138	I	0.081	0.448
66	P	173	D	0.08	0.446
118	A	141	P	0.08	0.446
208	W	214	G	0.08	0.446
79	D	86	S	0.08	0.446
35	V	150	Y	0.08	0.446
97	D	177	S	0.08	0.446
57	L	215	L	0.08	0.445
201	L	207	G	0.08	0.445
115	F	189	S	0.08	0.445
15	T	64	M	0.08	0.445
87	S	94	E	0.08	0.445
11	L	49	N	0.08	0.445
18	P	102	Y	0.08	0.445
42	G	160	K	0.08	0.445
69	H	121	K	0.08	0.445
183	L	210	L	0.08	0.444
75	F	98	G	0.08	0.444
203	V	217	L	0.08	0.444
75	F	81	T	0.08	0.444
179	V	212	S	0.08	0.444
78	E	144	F	0.08	0.443
21	I	56	A	0.08	0.443
176	V	208	W	0.08	0.443
35	V	64	M	0.08	0.443
97	D	121	K	0.08	0.443
34	F	43	L	0.08	0.443
62	F	175	V	0.08	0.443
114	F	156	K	0.08	0.443
114	F	142	S	0.08	0.443
114	F	167	L	0.08	0.443
23	S	217	L	0.08	0.443
72	Y	147	L	0.08	0.442
28	V	34	F	0.08	0.442
9	A	16	L	0.08	0.442
111	L	163	F	0.08	0.442
100	R	172	V	0.08	0.442
94	E	120	L	0.08	0.442
4	D	136	D	0.08	0.442
79	D	117	N	0.08	0.441
186	M	195	T	0.079	0.441
92	V	194	S	0.079	0.441
97	D	118	A	0.079	0.441
6	S	68	M	0.079	0.441
14	S	81	T	0.079	0.441
37	V	186	M	0.079	0.441
9	A	89	S	0.079	0.441
122	R	199	L	0.079	0.44
100	R	147	L	0.079	0.44
166	Y	189	S	0.079	0.44
27	F	176	V	0.079	0.439
62	F	164	Y	0.079	0.439
100	R	188	M	0.079	0.439
146	L	192	T	0.079	0.439
40	A	176	V	0.079	0.439
89	S	174	L	0.079	0.438
48	S	192	T	0.079	0.438
152	L	166	Y	0.079	0.437
109	R	215	L	0.079	0.437
18	P	25	T	0.079	0.437
59	L	110	E	0.079	0.436
48	S	56	A	0.079	0.436
60	S	205	L	0.079	0.436
111	L	204	A	0.079	0.436
20	I	178	S	0.079	0.436
157	S	204	A	0.079	0.436
71	A	162	G	0.078	0.435
19	F	177	S	0.078	0.435
62	F	110	E	0.078	0.435
46	I	183	L	0.078	0.434
81	T	89	S	0.078	0.434
5	I	21	I	0.078	0.434
71	A	177	S	0.078	0.434
159	F	175	V	0.078	0.434
152	L	217	L	0.078	0.434
56	A	149	A	0.078	0.434
159	F	182	A	0.078	0.434
169	F	177	S	0.078	0.433
27	F	35	V	0.078	0.433
108	D	120	L	0.078	0.433
83	N	134	D	0.078	0.433
84	D	193	I	0.078	0.433
95	G	137	E	0.078	0.433
86	S	157	S	0.078	0.433
19	F	178	S	0.078	0.433
34	F	155	I	0.078	0.432
19	F	217	L	0.078	0.432
18	P	178	S	0.078	0.432
92	V	99	Y	0.078	0.432
45	Q	213	K	0.078	0.432
47	P	146	L	0.078	0.432
45	Q	104	I	0.078	0.431
37	V	45	Q	0.078	0.431
11	L	136	D	0.078	0.431
96	L	214	G	0.078	0.431
69	H	81	T	0.078	0.431
41	L	65	W	0.077	0.43
19	F	112	V	0.077	0.43
7	L	17	L	0.077	0.43
37	V	161	I	0.077	0.43
8	I	91	H	0.077	0.429
106	Y	151	A	0.077	0.429
95	G	213	K	0.077	0.429
39	N	54	G	0.077	0.429
89	S	138	I	0.077	0.429
43	L	201	L	0.077	0.428
174	L	181	L	0.077	0.428
55	V	147	L	0.077	0.428
193	I	201	L	0.077	0.428
171	V	185	M	0.077	0.428
65	W	110	E	0.077	0.428
182	A	197	I	0.077	0.428
22	A	115	F	0.077	0.428
142	S	199	L	0.077	0.427
8	I	149	A	0.077	0.427
68	M	191	V	0.077	0.427
4	D	74	Y	0.077	0.427
5	I	50	M	0.077	0.426
35	V	138	I	0.077	0.426
8	I	17	L	0.077	0.426
169	F	198	K	0.077	0.426
134	D	142	S	0.077	0.426
37	V	49	N	0.077	0.426
88	L	176	V	0.077	0.425
53	N	212	S	0.077	0.425
120	L	145	A	0.077	0.425
183	L	196	P	0.077	0.425
69	H	162	G	0.076	0.424
13	F	22	A	0.076	0.424
105	K	161	I	0.076	0.424
23	S	91	H	0.076	0.424
189	S	196	P	0.076	0.424
119	Q	134	D	0.076	0.423
84	D	166	Y	0.076	0.423
173	D	198	K	0.076	0.423
73	V	84	D	0.076	0.423
44	Q	162	G	0.076	0.423
64	M	195	T	0.076	0.423
35	V	46	I	0.076	0.422
92	V	135	K	0.076	0.422
55	V	199	L	0.076	0.422
98	G	106	Y	0.076	0.422
36	M	42	G	0.076	0.422
46	I	175	V	0.076	0.422
191	V	216	I	0.076	0.422
41	L	68	M	0.076	0.422
115	F	157	S	0.076	0.422
12	A	78	E	0.076	0.422
9	A	103	L	0.076	0.422
121	K	164	Y	0.076	0.421
9	A	79	D	0.076	0.421
185	M	198	K	0.076	0.421
201	L	212	S	0.076	0.421
59	L	116	E	0.076	0.421
68	M	113	Q	0.076	0.421
44	Q	166	Y	0.076	0.42
205	L	211	L	0.076	0.419
87	S	93	D	0.075	0.419
81	T	92	V	0.075	0.419
179	V	193	I	0.075	0.419
73	V	139	E	0.075	0.419
58	L	141	P	0.075	0.419
107	S	152	L	0.075	0.418
44	Q	92	V	0.075	0.418
205	L	219	Y	0.075	0.418
135	K	178	S	0.075	0.418
32	I	42	G	0.075	0.418
19	F	121	K	0.075	0.418
149	A	204	A	0.075	0.418
200	V	207	G	0.075	0.418
65	W	211	L	0.075	0.417
36	M	209	T	0.075	0.417
208	W	218	Q	0.075	0.417
4	D	161	I	0.075	0.417
138	I	167	L	0.075	0.417
11	L	51	T	0.075	0.417
19	F	41	L	0.075	0.417
19	F	39	N	0.075	0.416
41	L	137	E	0.075	0.416
141	P	178	S	0.075	0.416
33	V	199	L	0.075	0.416
122	R	179	V	0.075	0.416
61	M	80	V	0.075	0.416
192	T	212	S	0.075	0.416
99	Y	115	F	0.075	0.416
5	I	137	E	0.075	0.415
74	Y	170	V	0.075	0.415
183	L	190	P	0.075	0.415
116	E	136	D	0.075	0.415
70	D	210	L	0.075	0.415
151	A	216	I	0.075	0.415
72	Y	201	L	0.075	0.415
115	F	142	S	0.075	0.415
118	A	213	K	0.075	0.414
116	E	213	K	0.075	0.414
168	P	189	S	0.075	0.414
50	M	204	A	0.075	0.414
60	S	219	Y	0.075	0.414
113	Q	141	P	0.074	0.413
68	M	176	V	0.074	0.413
86	S	113	Q	0.074	0.413
42	G	183	L	0.074	0.413
40	A	169	F	0.074	0.412
194	S	206	D	0.074	0.412
17	L	104	I	0.074	0.412
121	K	212	S	0.074	0.412
5	I	201	L	0.074	0.412
61	M	156	K	0.074	0.412
44	Q	175	V	0.074	0.412
78	E	95	G	0.074	0.412
184	G	193	I	0.074	0.412
181	L	194	S	0.074	0.412
6	S	17	L	0.074	0.412
24	G	204	A	0.074	0.412
43	L	181	L	0.074	0.412
141	P	191	V	0.074	0.411
153	S	177	S	0.074	0.411
88	L	179	V	0.074	0.41
44	Q	88	L	0.074	0.41
69	H	122	R	0.074	0.41
75	F	201	L	0.074	0.41
8	I	106	Y	0.074	0.41
15	T	47	P	0.074	0.41
61	M	195	T	0.074	0.41
50	M	192	T	0.074	0.41
169	F	196	P	0.074	0.41
10	L	144	F	0.074	0.41
115	F	148	P	0.074	0.409
114	F	193	I	0.074	0.409
178	S	200	V	0.074	0.409
96	L	104	I	0.074	0.409
22	A	164	Y	0.074	0.409
148	P	170	V	0.074	0.408
5	I	23	S	0.074	0.408
17	L	135	K	0.074	0.408
206	D	212	S	0.074	0.408
86	S	219	Y	0.074	0.408
201	L	210	L	0.074	0.408
63	V	197	I	0.074	0.408
112	V	156	K	0.073	0.408
37	V	90	K	0.073	0.408
29	K	37	V	0.073	0.407
157	S	179	V	0.073	0.407
173	D	196	P	0.073	0.407
141	P	147	L	0.073	0.407
93	D	193	I	0.073	0.407
60	S	171	V	0.073	0.407
196	P	203	V	0.073	0.407
68	M	97	D	0.073	0.407
178	S	189	S	0.073	0.407
33	V	83	N	0.073	0.407
49	N	145	A	0.073	0.407
24	G	106	Y	0.073	0.407
32	I	191	V	0.073	0.407
25	T	140	K	0.073	0.406
34	F	40	A	0.073	0.406
74	Y	137	E	0.073	0.406
92	V	139	E	0.073	0.406
36	M	106	Y	0.073	0.406
16	L	144	F	0.073	0.406
196	P	215	L	0.073	0.406
136	D	151	A	0.073	0.405
28	V	65	W	0.073	0.405
109	R	219	Y	0.073	0.405
135	K	182	A	0.073	0.405
174	L	216	I	0.073	0.405
164	Y	179	V	0.073	0.405
84	D	119	Q	0.073	0.405
42	G	216	I	0.073	0.405
65	W	101	D	0.073	0.405
106	Y	204	A	0.073	0.404
82	F	107	S	0.073	0.404
89	S	96	L	0.073	0.404
23	S	43	L	0.073	0.404
177	S	187	M	0.073	0.403
205	L	217	L	0.073	0.403
18	P	29	K	0.073	0.403
138	I	213	K	0.073	0.403
145	A	155	I	0.073	0.403
108	D	154	E	0.073	0.403
190	P	208	W	0.073	0.403
30	F	134	D	0.073	0.403
114	F	120	L	0.073	0.403
20	I	136	D	0.073	0.403
149	A	191	V	0.073	0.402
145	A	176	V	0.072	0.402
110	E	120	L	0.072	0.402
55	V	75	F	0.072	0.402
35	V	163	F	0.072	0.402
6	S	37	V	0.072	0.402
169	F	184	G	0.072	0.401
16	L	68	M	0.072	0.401
82	F	113	Q	0.072	0.4
7	L	84	D	0.072	0.4
189	S	216	I	0.072	0.4
26	C	56	A	0.072	0.4
172	V	212	S	0.072	0.4
194	S	202	F	0.072	0.4
62	F	211	L	0.072	0.4
120	L	177	S	0.072	0.4
183	L	195	T	0.072	0.399
57	L	156	K	0.072	0.399
187	M	198	K	0.072	0.399
19	F	219	Y	0.072	0.399
37	V	117	N	0.072	0.399
173	D	184	G	0.072	0.399
79	D	211	L	0.072	0.399
187	M	200	V	0.072	0.399
52	L	108	D	0.072	0.398
4	D	46	I	0.072	0.398
176	V	190	P	0.072	0.398
17	L	87	S	0.072	0.398
188	M	196	P	0.072	0.398
17	L	188	M	0.072	0.398
15	T	85	I	0.072	0.398
188	M	212	S	0.072	0.398
54	G	62	F	0.072	0.398
202	F	215	L	0.072	0.398
209	T	217	L	0.072	0.398
84	D	104	I	0.072	0.397
180	L	198	K	0.072	0.397
53	N	119	Q	0.072	0.397
82	F	159	F	0.072	0.397
32	I	187	M	0.072	0.397
49	N	81	T	0.071	0.397
14	S	80	V	0.071	0.397
190	P	203	V	0.071	0.397
151	A	205	L	0.071	0.396
89	S	146	L	0.071	0.396
61	M	191	V	0.071	0.396
66	P	180	L	0.071	0.396
59	L	167	L	0.071	0.396
61	M	188	M	0.071	0.396
4	D	95	G	0.071	0.396
69	H	141	P	0.071	0.396
150	Y	174	L	0.071	0.396
46	I	53	N	0.071	0.395
60	S	177	S	0.071	0.395
46	I	105	K	0.071	0.395
181	L	190	P	0.071	0.395
180	L	207	G	0.071	0.395
17	L	154	E	0.071	0.395
193	I	208	W	0.071	0.395
54	G	119	Q	0.071	0.394
114	F	158	A	0.071	0.394
189	S	217	L	0.071	0.394
118	A	219	Y	0.071	0.394
154	E	172	V	0.071	0.394
11	L	155	I	0.071	0.394
97	D	194	S	0.071	0.394
89	S	110	E	0.071	0.394
80	V	87	S	0.071	0.394
38	R	153	S	0.071	0.393
113	Q	122	R	0.071	0.393
112	V	119	Q	0.071	0.393
9	A	94	E	0.071	0.393
88	L	96	L	0.071	0.393
120	L	179	V	0.071	0.393
69	H	82	F	0.071	0.393
15	T	73	V	0.071	0.393
65	W	149	A	0.071	0.393
74	Y	96	L	0.071	0.393
68	M	82	F	0.071	0.392
120	L	144	F	0.071	0.392
53	N	210	L	0.071	0.392
5	I	122	R	0.071	0.392
184	G	208	W	0.071	0.392
190	P	199	L	0.071	0.392
14	S	60	S	0.071	0.392
70	D	105	K	0.071	0.392
136	D	176	V	0.071	0.392
14	S	41	L	0.071	0.392
182	A	204	A	0.071	0.392
97	D	217	L	0.071	0.391
51	T	175	V	0.07	0.391
204	A	217	L	0.07	0.391
40	A	174	L	0.07	0.391
177	S	192	T	0.07	0.391
52	L	73	V	0.07	0.391
117	N	136	D	0.07	0.391
35	V	168	P	0.07	0.39
45	Q	112	V	0.07	0.39
49	N	150	Y	0.07	0.39
29	K	106	Y	0.07	0.39
198	K	204	A	0.07	0.39
97	D	137	E	0.07	0.39
52	L	81	T	0.07	0.39
202	F	211	L	0.07	0.389
57	L	145	A	0.07	0.389
176	V	184	G	0.07	0.389
72	Y	88	L	0.07	0.389
155	I	162	G	0.07	0.389
45	Q	216	I	0.07	0.389
48	S	155	I	0.07	0.389
41	L	149	A	0.07	0.388
9	A	67	I	0.07	0.388
32	I	186	M	0.07	0.388
29	K	141	P	0.07	0.388
99	Y	162	G	0.07	0.388
56	A	215	L	0.07	0.388
24	G	30	F	0.07	0.388
25	T	31	S	0.07	0.388
88	L	109	R	0.07	0.388
53	N	213	K	0.07	0.388
151	A	157	S	0.07	0.388
59	L	215	L	0.07	0.387
17	L	38	R	0.07	0.387
10	L	176	V	0.07	0.387
19	F	165	L	0.07	0.387
84	D	118	A	0.07	0.387
204	A	211	L	0.07	0.387
170	V	206	D	0.07	0.387
29	K	40	A	0.07	0.386
16	L	53	N	0.07	0.386
65	W	136	D	0.07	0.386
80	V	140	K	0.07	0.386
48	S	88	L	0.07	0.386
81	T	103	L	0.069	0.386
16	L	47	P	0.069	0.385
56	A	163	F	0.069	0.385
107	S	163	F	0.069	0.385
19	F	54	G	0.069	0.385
203	V	214	G	0.069	0.385
65	W	79	D	0.069	0.385
170	V	202	F	0.069	0.385
20	I	94	E	0.069	0.385
207	G	219	Y	0.069	0.385
84	D	120	L	0.069	0.385
52	L	162	G	0.069	0.385
29	K	60	S	0.069	0.384
94	E	122	R	0.069	0.384
5	I	60	S	0.069	0.384
7	L	159	F	0.069	0.384
28	V	186	M	0.069	0.384
8	I	219	Y	0.069	0.383
106	Y	139	E	0.069	0.383
79	D	88	L	0.069	0.383
138	I	144	F	0.069	0.383
34	F	105	K	0.069	0.383
62	F	151	A	0.069	0.383
89	S	165	L	0.069	0.383
136	D	186	M	0.069	0.383
136	D	217	L	0.069	0.383
11	L	157	S	0.069	0.382
19	F	33	V	0.069	0.382
92	V	179	V	0.069	0.382
180	L	193	I	0.069	0.382
119	Q	159	F	0.069	0.381
111	L	153	S	0.069	0.381
204	A	213	K	0.069	0.381
106	Y	114	F	0.069	0.381
7	L	90	K	0.069	0.381
157	S	218	Q	0.069	0.381
49	N	146	L	0.069	0.381
63	V	182	A	0.068	0.38
71	A	78	E	0.068	0.38
156	K	209	T	0.068	0.38
96	L	113	Q	0.068	0.379
93	D	218	Q	0.068	0.379
106	Y	154	E	0.068	0.379
32	I	78	E	0.068	0.379
121	K	143	I	0.068	0.379
24	G	149	A	0.068	0.379
121	K	141	P	0.068	0.379
52	L	155	I	0.068	0.379
120	L	199	L	0.068	0.378
16	L	180	L	0.068	0.378
194	S	207	G	0.068	0.378
144	F	182	A	0.068	0.378
69	H	154	E	0.068	0.378
50	M	140	K	0.068	0.378
79	D	140	K	0.068	0.377
44	Q	94	E	0.068	0.377
62	F	216	I	0.068	0.377
69	H	160	K	0.068	0.377
138	I	210	L	0.068	0.377
24	G	193	I	0.068	0.377
108	D	212	S	0.068	0.376
82	F	195	T	0.068	0.376
8	I	159	F	0.068	0.376
102	Y	115	F	0.068	0.376
122	R	217	L	0.068	0.376
78	E	88	L	0.068	0.375
61	M	212	S	0.068	0.375
95	G	166	Y	0.068	0.375
67	I	162	G	0.068	0.375
42	G	170	V	0.068	0.375
102	Y	157	S	0.068	0.375
83	N	117	N	0.068	0.375
192	T	214	G	0.068	0.375
138	I	195	T	0.068	0.375
74	Y	107	S	0.067	0.375
109	R	147	L	0.067	0.375
146	L	176	V	0.067	0.375
94	E	113	Q	0.067	0.374
36	M	52	L	0.067	0.374
109	R	141	P	0.067	0.374
45	Q	215	L	0.067	0.374
50	M	199	L	0.067	0.374
21	I	167	L	0.067	0.374
53	N	73	V	0.067	0.373
120	L	135	K	0.067	0.373
211	L	218	Q	0.067	0.373
51	T	200	V	0.067	0.373
164	Y	197	I	0.067	0.373
51	T	119	Q	0.067	0.373
9	A	142	S	0.067	0.373
13	F	108	D	0.067	0.373
93	D	114	F	0.067	0.373
45	Q	194	S	0.067	0.372
110	E	204	A	0.067	0.372
39	N	145	A	0.067	0.372
14	S	35	V	0.067	0.372
91	H	148	P	0.067	0.372
72	Y	92	V	0.067	0.372
19	F	103	L	0.067	0.372
11	L	192	T	0.067	0.371
141	P	186	M	0.067	0.371
13	F	199	L	0.067	0.371
15	T	25	T	0.067	0.371
68	M	80	V	0.067	0.371
73	V	172	V	0.067	0.371
94	E	145	A	0.067	0.371
45	Q	95	G	0.067	0.37
29	K	142	S	0.067	0.37
32	I	219	Y	0.067	0.37
56	A	176	V	0.067	0.37
43	L	75	F	0.067	0.37
34	F	49	N	0.067	0.37
6	S	108	D	0.067	0.37
111	L	206	D	0.067	0.37
155	I	212	S	0.067	0.37
67	I	163	F	0.067	0.369
175	V	191	V	0.067	0.369
208	W	216	I	0.066	0.369
62	F	200	V	0.066	0.369
57	L	75	F	0.066	0.369
26	C	59	L	0.066	0.369
4	D	201	L	0.066	0.369
64	M	103	L	0.066	0.368
164	Y	170	V	0.066	0.368
96	L	155	I	0.066	0.368
112	V	214	G	0.066	0.368
107	S	140	K	0.066	0.368
55	V	116	E	0.066	0.368
71	A	137	E	0.066	0.368
29	K	56	A	0.066	0.368
20	I	112	V	0.066	0.368
65	W	170	V	0.066	0.368
59	L	188	M	0.066	0.368
39	N	51	T	0.066	0.367
105	K	209	T	0.066	0.367
56	A	72	Y	0.066	0.367
83	N	90	K	0.066	0.367
87	S	193	I	0.066	0.367
18	P	103	L	0.066	0.367
90	K	140	K	0.066	0.367
79	D	94	E	0.066	0.367
196	P	211	L	0.066	0.367
179	V	219	Y	0.066	0.366
32	I	60	S	0.066	0.366
85	I	99	Y	0.066	0.366
57	L	86	S	0.066	0.366
96	L	139	E	0.066	0.366
117	N	161	I	0.066	0.366
88	L	191	V	0.066	0.366
5	I	89	S	0.066	0.366
56	A	162	G	0.066	0.365
71	A	188	M	0.066	0.365
54	G	100	R	0.066	0.365
140	K	178	S	0.066	0.365
39	N	134	D	0.066	0.365
92	V	104	I	0.066	0.365
51	T	204	A	0.066	0.365
12	A	20	I	0.066	0.365
104	I	149	A	0.066	0.365
164	Y	186	M	0.066	0.364
169	F	190	P	0.066	0.364
5	I	57	L	0.066	0.364
19	F	201	L	0.066	0.364
116	E	211	L	0.066	0.364
63	V	156	K	0.066	0.364
21	I	45	Q	0.066	0.364
164	Y	211	L	0.066	0.364
150	Y	195	T	0.065	0.363
21	I	157	S	0.065	0.363
25	T	60	S	0.065	0.363
180	L	189	S	0.065	0.363
144	F	167	L	0.065	0.363
49	N	197	I	0.065	0.363
69	H	195	T	0.065	0.363
7	L	22	A	0.065	0.363
43	L	182	A	0.065	0.362
59	L	194	S	0.065	0.362
157	S	191	V	0.065	0.362
11	L	142	S	0.065	0.362
111	L	161	I	0.065	0.362
31	S	83	N	0.065	0.362
173	D	190	P	0.065	0.362
93	D	116	E	0.065	0.361
144	F	194	S	0.065	0.361
62	F	119	Q	0.065	0.361
6	S	74	Y	0.065	0.361
58	L	67	I	0.065	0.361
13	F	28	V	0.065	0.361
115	F	199	L	0.065	0.361
117	N	166	Y	0.065	0.361
189	S	198	K	0.065	0.361
22	A	201	L	0.065	0.361
150	Y	207	G	0.065	0.36
81	T	104	I	0.065	0.36
116	E	195	T	0.065	0.36
15	T	120	L	0.065	0.36
169	F	207	G	0.065	0.36
106	Y	187	M	0.065	0.36
157	S	201	L	0.065	0.36
60	S	85	I	0.065	0.36
85	I	109	R	0.065	0.36
46	I	189	S	0.065	0.359
20	I	99	Y	0.065	0.359
44	Q	53	N	0.065	0.359
81	T	101	D	0.065	0.359
142	S	148	P	0.065	0.359
33	V	204	A	0.065	0.359
56	A	144	F	0.065	0.359
44	Q	67	I	0.065	0.359
63	V	144	F	0.065	0.359
54	G	141	P	0.065	0.359
10	L	85	I	0.065	0.359
89	S	119	Q	0.065	0.358
46	I	108	D	0.065	0.358
71	A	80	V	0.065	0.358
173	D	207	G	0.065	0.358
52	L	211	L	0.065	0.358
48	S	170	V	0.064	0.358
66	P	168	P	0.064	0.358
11	L	106	Y	0.064	0.358
12	A	111	L	0.064	0.358
175	V	196	P	0.064	0.357
60	S	108	D	0.064	0.357
85	I	119	Q	0.064	0.357
105	K	138	I	0.064	0.357
42	G	82	F	0.064	0.357
173	D	187	M	0.064	0.357
74	Y	174	L	0.064	0.357
177	S	195	T	0.064	0.357
5	I	213	K	0.064	0.357
46	I	160	K	0.064	0.357
4	D	119	Q	0.064	0.357
174	L	201	L	0.064	0.357
41	L	114	F	0.064	0.357
96	L	195	T	0.064	0.356
56	A	136	D	0.064	0.356
151	A	218	Q	0.064	0.356
147	L	206	D	0.064	0.356
26	C	92	V	0.064	0.356
54	G	214	G	0.064	0.356
147	L	185	M	0.064	0.356
11	L	160	K	0.064	0.356
57	L	66	P	0.064	0.356
22	A	109	R	0.064	0.356
122	R	142	S	0.064	0.355
42	G	61	M	0.064	0.355
121	K	165	L	0.064	0.355
143	I	195	T	0.064	0.355
47	P	185	M	0.064	0.355
17	L	217	L	0.064	0.355
84	D	163	F	0.064	0.355
94	E	216	I	0.064	0.355
101	D	121	K	0.064	0.355
67	I	135	K	0.064	0.355
[truncated: 17,529 more rows]
